# Supplementary material for: Effect of cerium oxide nanoparticles on intestinal serotonin in zebrafish
Source: Royal Society of Chemistry journal article supplement (doi:10.1039/c3ra41739e), 2013-01-01
Supplement: c3ra41739e.pdf [file c3ra41739e.pdf]

## Supplementary Information

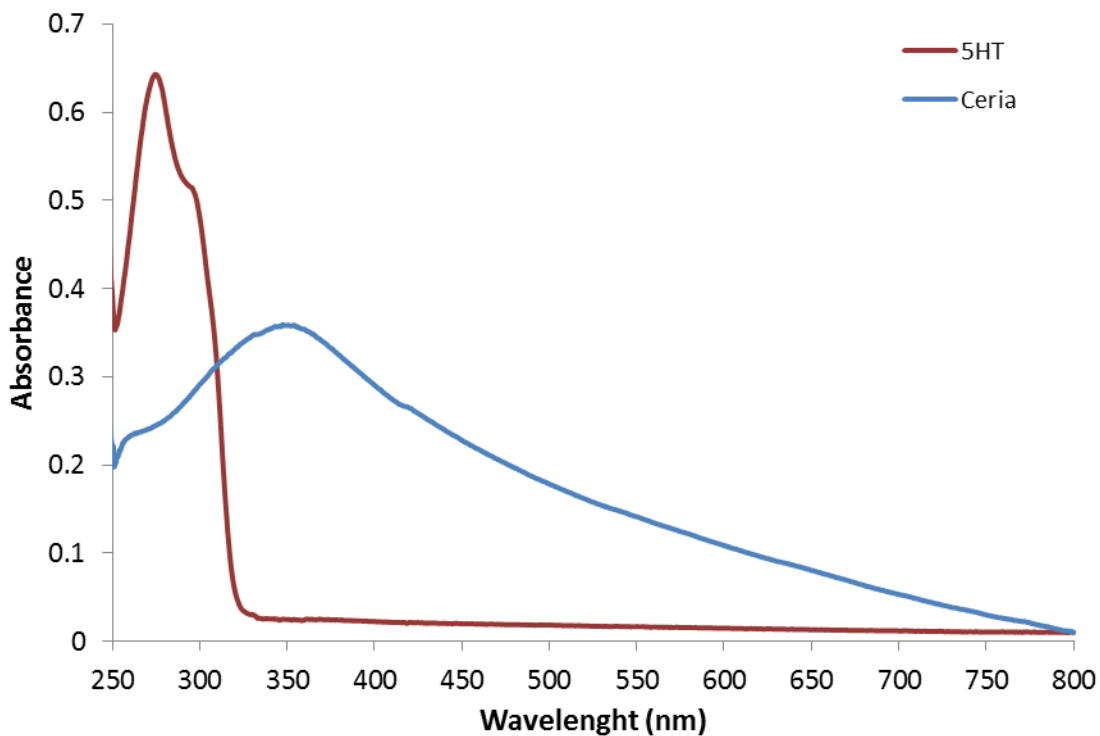

**Figure S1.** UV-Vis spectra of 5-HT and nanoceria. All experiments were conducted with 3 mM 5-HT and 50 ppm nanoceria dispersion.
